# Supplementary material for: Enhancing upconversion emissions and temperature sensing properties by incorporating Mn2+ for KLu2F7:Yb3+/Er3+ nanocrystals based on thermally and non-thermally coupled levels
Source: Royal Society of Chemistry journal article supplement (doi:10.1039/d0nj06195f), 2021-01-01
Supplement: d0nj06195f1.pdf [file d0nj06195f1.pdf]

## Supporting Information

### **Enhancing upconversion emissions and temperature sensing properties by incorporating Mn<sup>2+</sup> for KLu<sub>2</sub>F<sub>7</sub>:Yb<sup>3+</sup>/Er<sup>3+</sup> nanocrystals based on thermally and non-thermally coupled levels**

Yan Peng, Zhiyuan Cheng, Wasim Ullah Khan, Tong Liu, Menghan Shen, Shenghong

Yang, Yueli Zhang\*

*State Key Laboratory of Optoelectronic Materials and Technologies, School of Materials Science and*

*Engineering, Sun Yat-Sen University, Guangzhou, 510275, China*

\*Corresponding Author: stszyl@mail.sysu.edu.cn.

**Table S1.** Crystal plan and size for the most intense plans of the  $\text{KLu}_2\text{F}_7:\text{Yb}^{3+}/\text{Er}^{3+}/\text{X}\%$   $\text{Mn}^{2+}$  ( $\text{X}=0, 8, 20$ ) nanocrystals.

| $2\theta$ ( $^\circ$ ) | Plan    | size/nm<br>(Undoped) | size/nm<br>(8% Mn) | size/nm<br>(20% Mn) |
|------------------------|---------|----------------------|--------------------|---------------------|
| 15.1                   | (2 0 0) | 245.13               | 228.18             | 197.14              |
| 27.7                   | (2 3 1) | 299.32               | 276.40             | 251.24              |
| 30.8                   | (2 2 2) | 267.51               | 242.30             | 259.76              |
| 47.4                   | (4 1 3) | 306.11               | 245.50             | 217.61              |

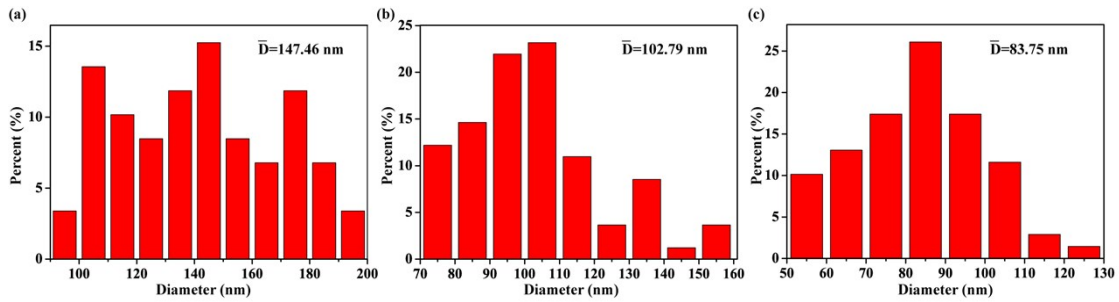

**Fig. S1.** The size distribution of (a)  $\text{KLu}_2\text{F}_7:\text{Yb}^{3+}/\text{Er}^{3+}$ , (b)  $\text{KLu}_2\text{F}_7:\text{Yb}^{3+}/\text{Er}^{3+}/8\%$   $\text{Mn}^{2+}$  and (c)  $\text{KLu}_2\text{F}_7:\text{Yb}^{3+}/\text{Er}^{3+}/20\%$   $\text{Mn}^{2+}$  nanocrystals.

**Table S2.** The Quantitative EDS analysis data of  $\text{KLu}_2\text{F}_7:\text{Yb}^{3+}/\text{Er}^{3+}/8\%$   $\text{Mn}^{2+}$  nanocrystals.

| Element | Wt%   | At%   |
|---------|-------|-------|
| F       | 26.66 | 73.28 |
| Lu      | 50.27 | 15.01 |
| Yb      | 14.29 | 4.31  |
| K       | 3.11  | 4.17  |
| Mn      | 2.31  | 2.19  |
| Er      | 3.36  | 1.05  |
